# Supplementary material for: RNA-protein binding motifs mining with a new hybrid deep learning based cross-domain knowledge integration approach
Source: PubMed Central journal article supplement (PMC5331642; doi:10.1186/s12859-017-1561-8), 2017-02-28
Supplement: 12859_2017_1561_MOESM2_ESM.pdf [file 12859_2017_1561_MOESM2_ESM.pdf]

# Supplementary Materials

RNA-protein binding motifs mining with a new hybrid deep learning based cross-domain knowledge integration approach

Xiaoyong Pan and Hong-Bin Shen

## 1 Methods

### 1.1 Identifying binding motifs using iDeep

The CNN module in iDeep is able to detect binding motifs using its filters, which recognize the motif in a set of input sequences [1, 2]. For each sequence  $S_m$  and filter with size  $L$ , if the activation value  $A_{mfi}$  of filter  $f$  at position  $i$  is greater than the cut-off, e.g.  $0.5\max_{mi} A_{mfi}$ , then this sequence in windows  $L$  centring the position  $i$  is selected. After selecting the motif sequences, WebLogo is used for alignment and visualization.

$$A_{mfi} = ReLU\left(\sum_{l=1}^L \sum_{d=1}^D w_{fld} * s_{m,i+1,d}\right) \quad (1)$$

where  $ReLU(x) = \max(0, x)$ ,  $w_f$  is the weights of filter  $f$ ,  $m$  is the sequence length.  $D$  is 4, the dimension of the one-hot encoding of nucleotide sequence.

### 1.2 Motif enrichment analysis

We use predicted motifs by iDeep to scan the input sequences, identify the binding sites. And then we do the same for the shuffled sequences as the background sequences. Here we applied the AME in the MEME suite [3] to get the motif enrichment.

### 1.3 The architecture of deep belief network

The architecture of DBN for input modalities clip-cobinding, Structure, Region type and Motif are as follows:

1. Fully connected layer
2. PReLU layer
3. BatchNormalization layer
4. Dropout layer
5. Fully connected layer
6. PReLU layer
7. BatchNormalization layer
8. Dropout layers

Additional layer for merging outputs from CNNs and DBNs:

9. Fully connected layer

10. Softmax layer

## 2 Results

| Protein    | # of motifs | protein     | # of motifs | protein   | # of motifs |
|------------|-------------|-------------|-------------|-----------|-------------|
| 1 Ago/EIF  | 8           | 12 ESWR1    | 14          | 22 Nsun2  | 15          |
| 2 Ago2M    | 13          | 13 FUS      | 11          | 23 PUM2   | 8           |
| 3 Ago2     | 13          | 14 Mut FUS  | 11          | 24 QKI    | 10          |
| 4 Ago2     | 15          | 15 IGF2.1-3 | 12          | 25 SRSF1  | 7           |
| 5 Ago2     | 8           | 16 hnRNPC   | 6           | 26 TAF15  | 12          |
| 6 eIF4AIII | 8           | 17 hnRNPC   | 10          | 27 TDP-43 | 12          |
| 7 eIF4AIII | 20          | 18 hnRNPL   | 11          | 28 TIA1   | 11          |
| 8 ELAVL1   | 15          | 19 hnRNPL   | 9           | 29 TIAL1  | 13          |
| 9 ELAVL1M  | 11          | 20 hnRNPL1  | 10          | 30 U2AF2  | 13          |
| 10 ELAVL1A | 8           | 21 MOV10    | 13          | 31 U2AF2  | 10          |
| 11 ELAVL1  | 13          |             |             |           |             |

Table S1: The discovered number of known motifs in CISBP-RNA agreeing with 102 filters from CNNs in iDeep for individual experiments.

## References

- [1] Alipanahi, B. *et al.* (2015) Predicting the sequence specificities of DNA- and RNA-binding proteins by deep learning. *Nat Biotechnol.* **33**, 831-8.
- [2] Kelley, D.R. *et al.* (2016) Basset: learning the regulatory code of the accessible genome with deep convolutional neural networks. *Genome Res.* 3.
- [3] Bailey TL, Johnson J, Grant CE, Noble WS. (2015) The MEME Suite. *Nucleic Acids Res.* 43(W1):W39-49. doi: 10.1093/nar/gkv416.
