# Supplementary material for: RNA-protein binding motifs mining with a new hybrid deep learning based cross-domain knowledge integration approach
Source: PubMed Central journal article supplement (PMC5331642; doi:10.1186/s12859-017-1561-8), 2017-02-28

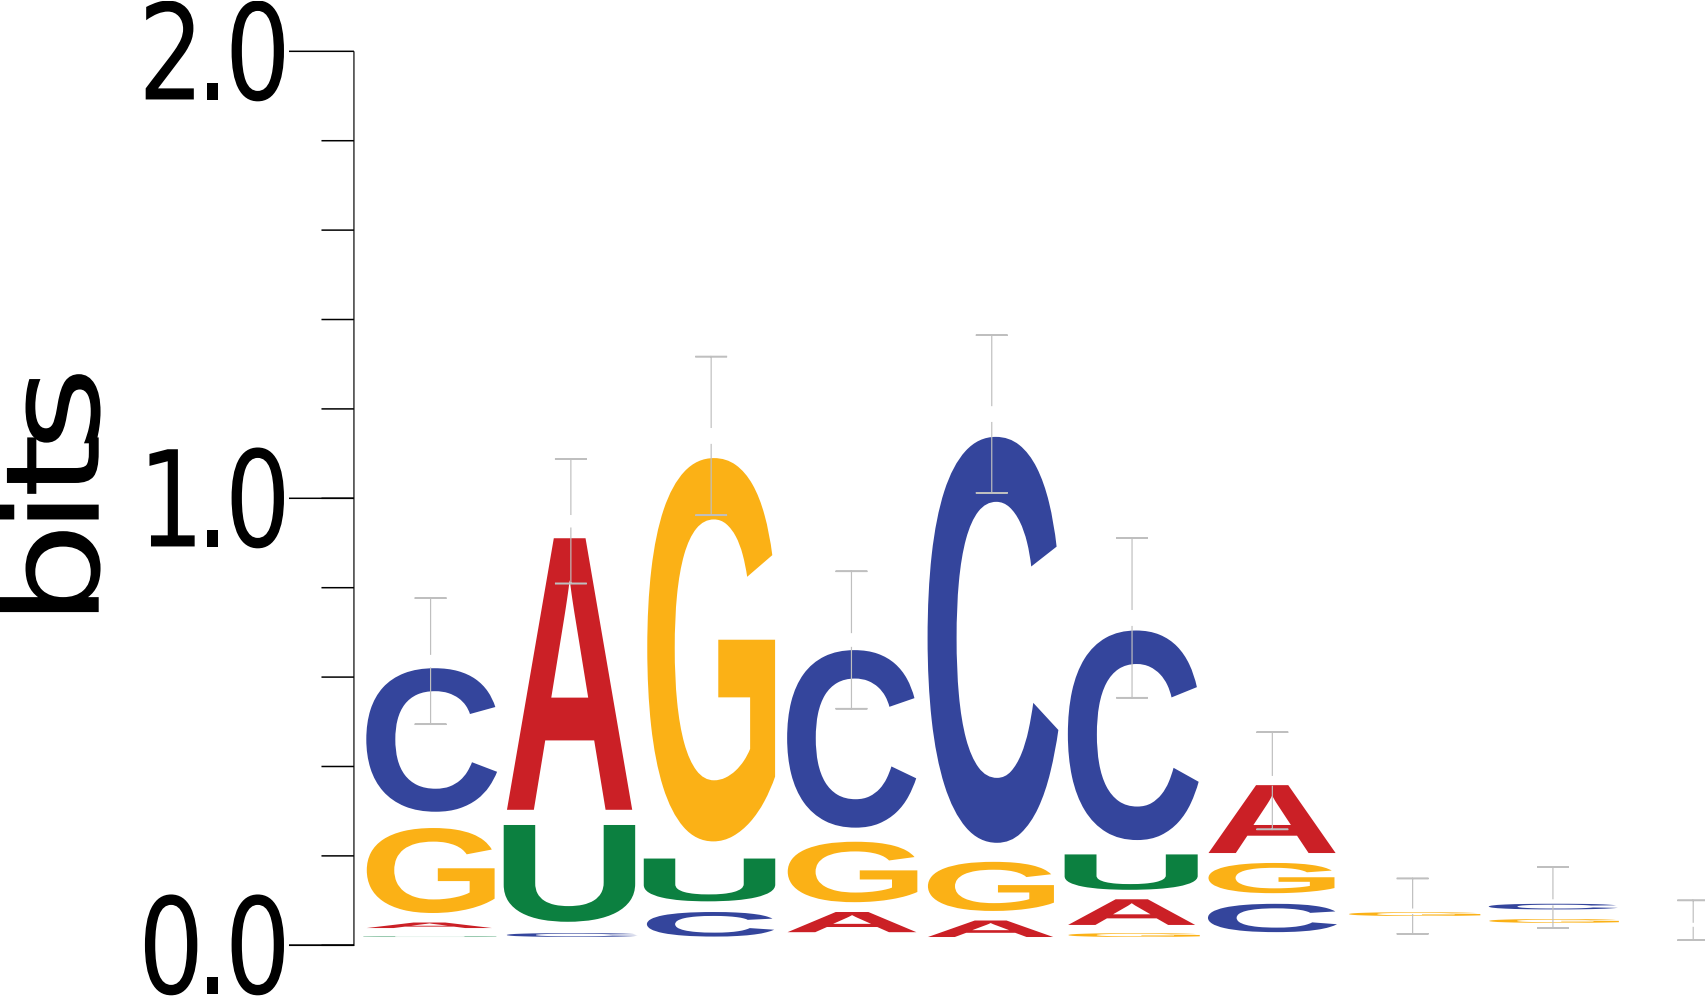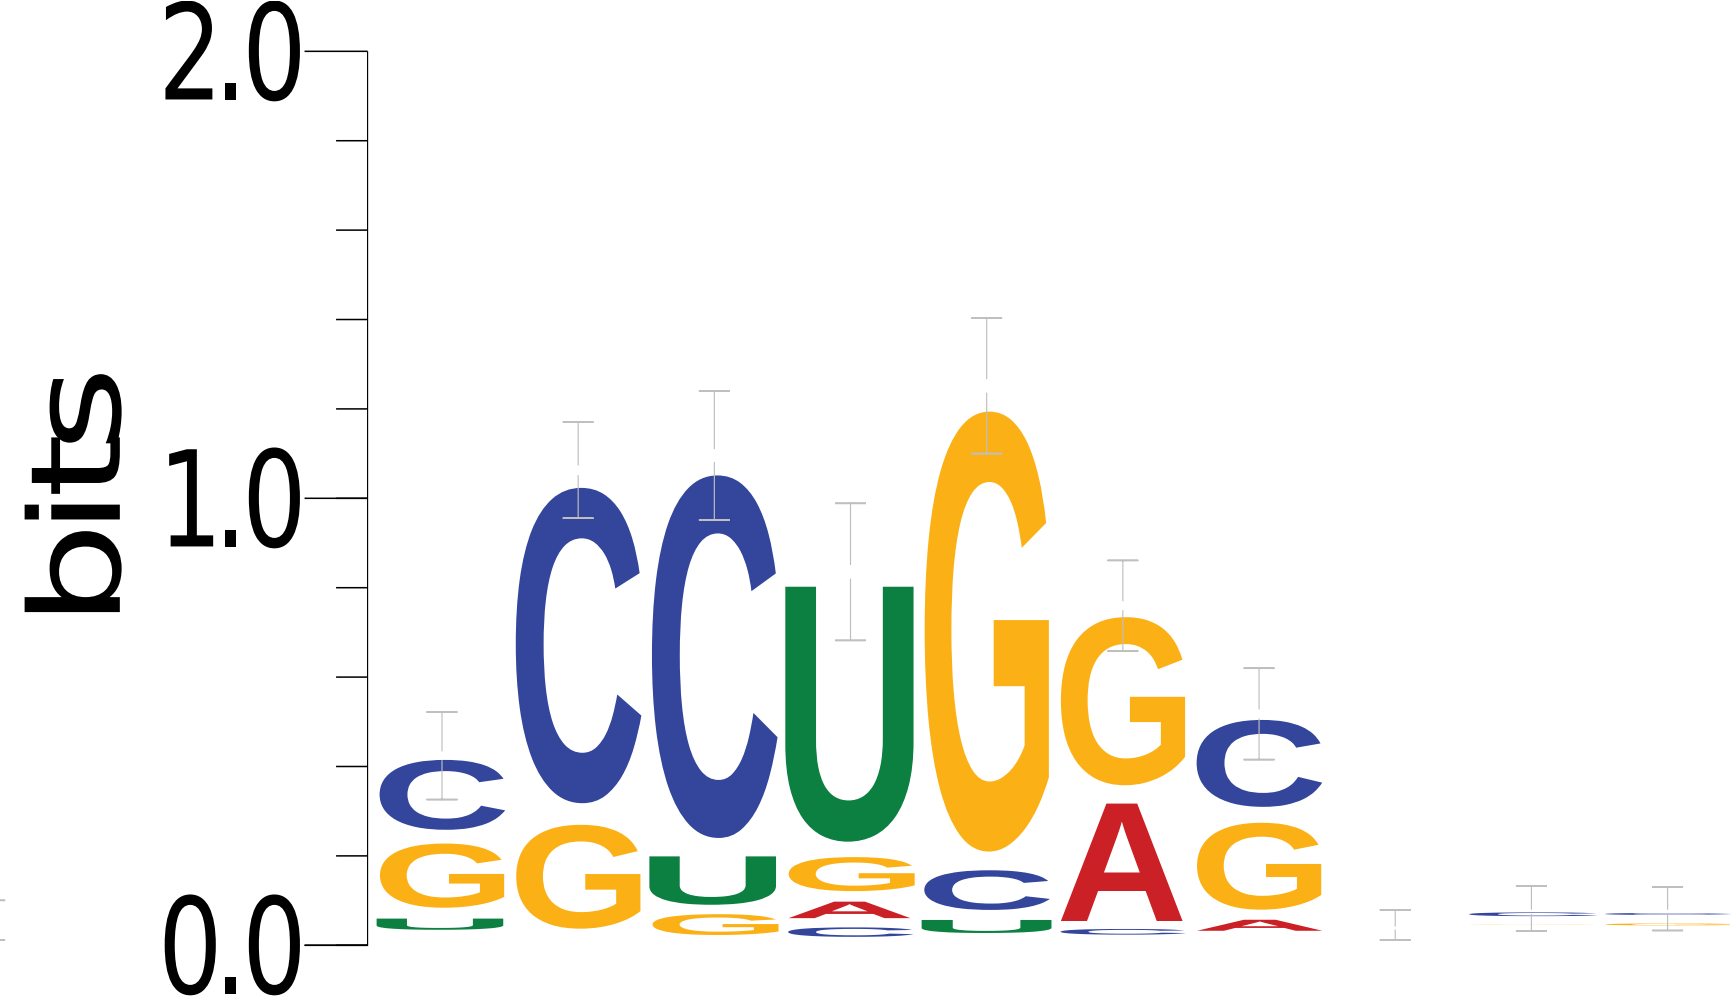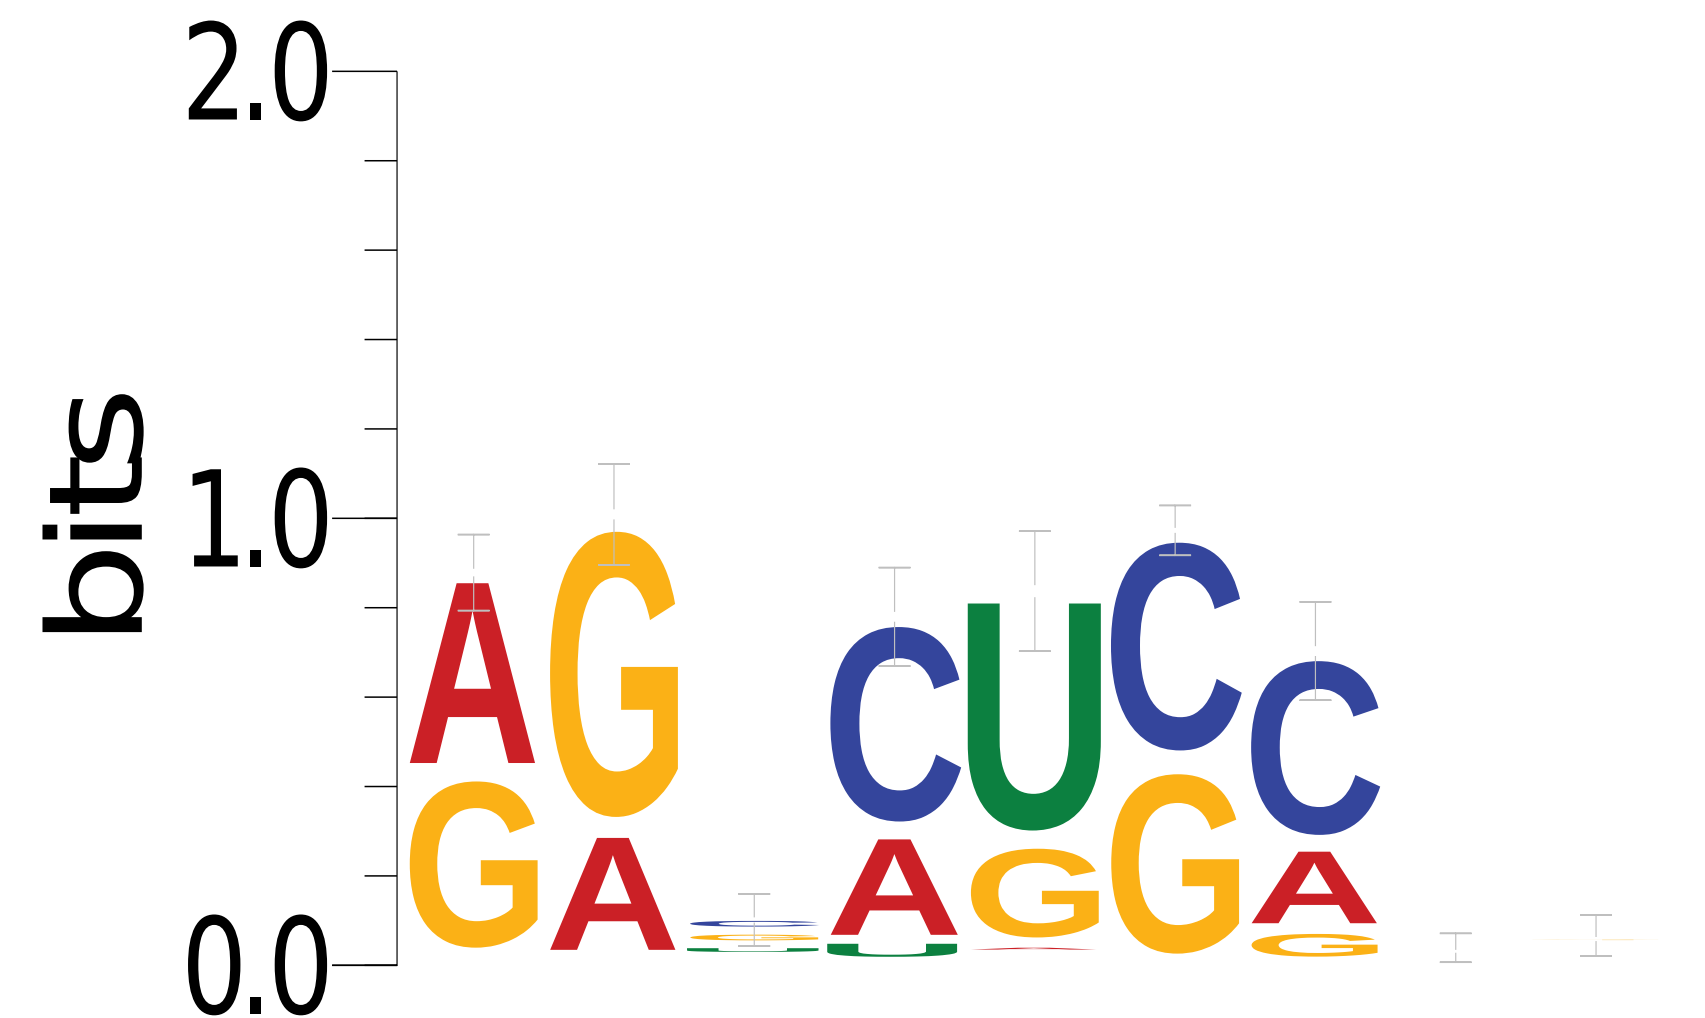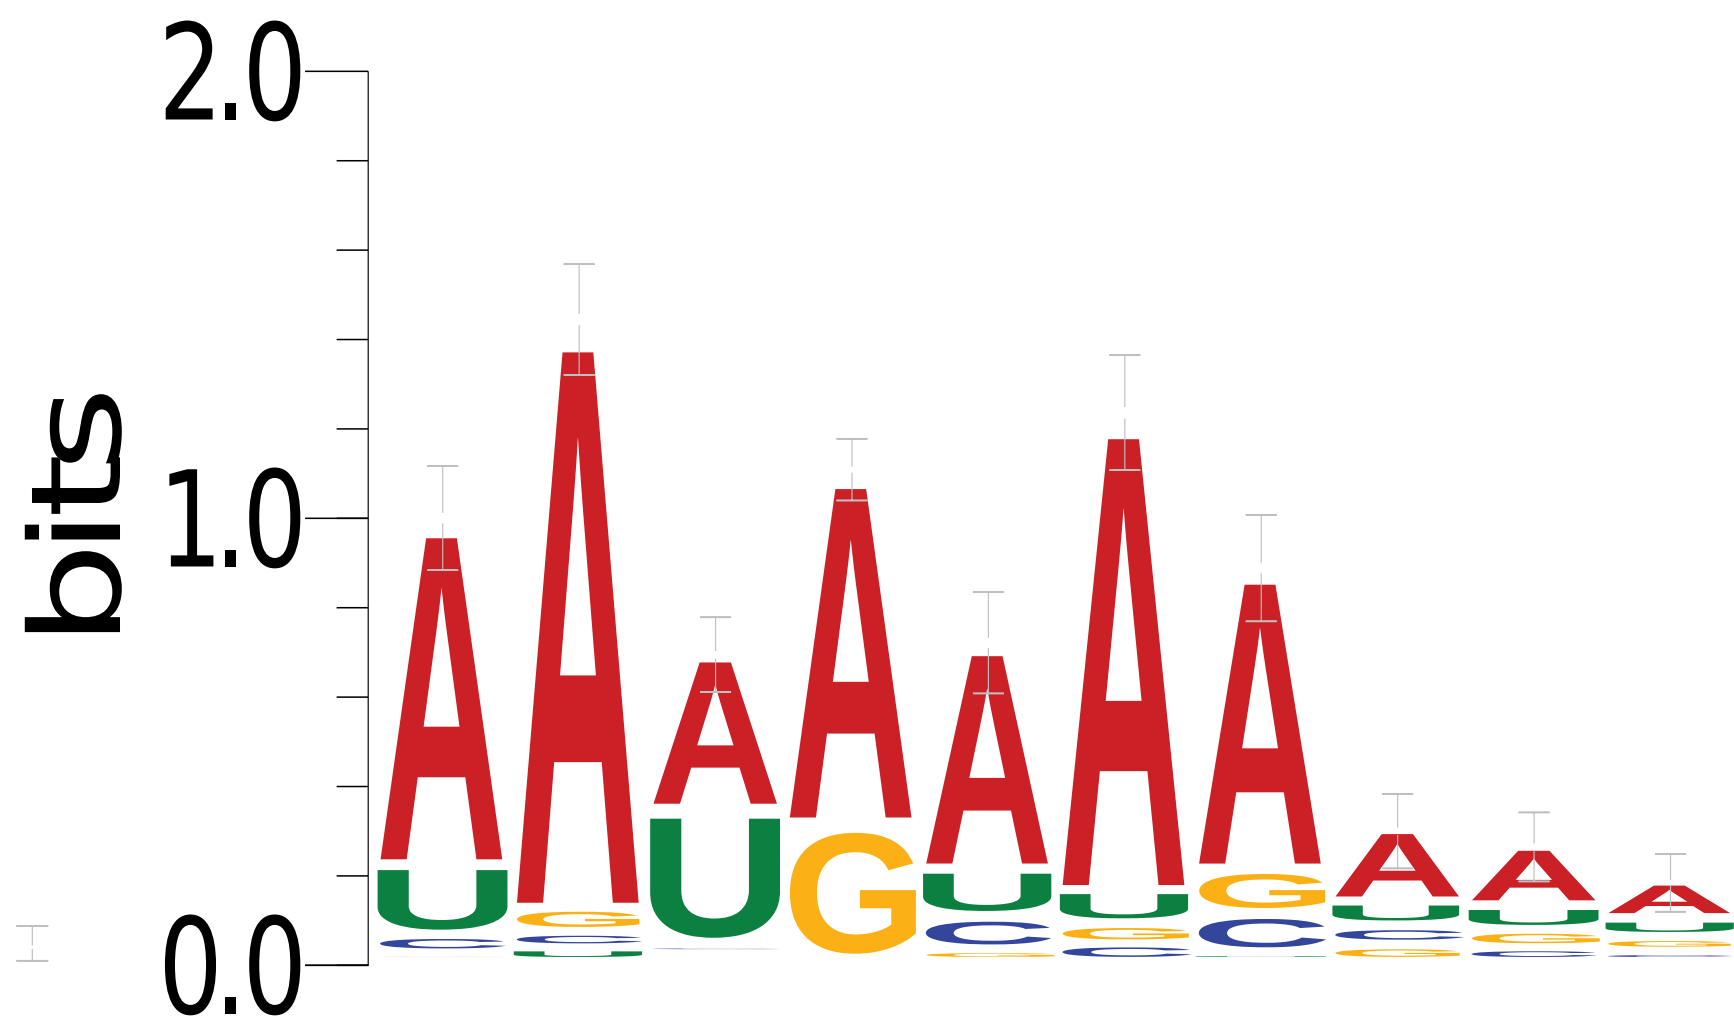

Supplement: 12859_2017_1561_MOESM3_ESM.pdf [file 12859_2017_1561_MOESM3_ESM.pdf]
